# Supplementary material for: Hydrozoan nematocytes send and receive synaptic signals induced by mechano-chemical stimuli
Source: Oxford University Press journal article supplement (doi:10.1242/jeb.018515), 2008-08-22
Supplement: jeb018515-sup-018515-tables1.pdf [file jeb018515-sup-018515-tables1.pdf]

| Table S1. Morphological and electrical characteristics of nematocytes and characteristic data of L- and T-potentials                                                                                 |                                                                                         |                                            |                                    |                                  |
|------------------------------------------------------------------------------------------------------------------------------------------------------------------------------------------------------|-----------------------------------------------------------------------------------------|--------------------------------------------|------------------------------------|----------------------------------|
|                                                                                                                                                                                                      | <i>Stauridiosarsia producta</i>                                                         |                                            | <i>Coryne tubulosa</i>             | <i>Dipurena reesi</i>            |
|                                                                                                                                                                                                      | Large cells                                                                             | Small cells                                |                                    |                                  |
| Size of cell soma (length, diameter; $\mu\text{m}$ )                                                                                                                                                 | 35, 22                                                                                  | 18, 12                                     | 16–23, 10–16                       | ~20, 12                          |
| Membrane resistance ( $\text{M}\Omega$ )                                                                                                                                                             | 31 $\pm$ 14<br>( <i>N</i> =40)                                                          | 50.8 $\pm$ 19.6<br>( <i>N</i> =6)          | 35.6 $\pm$ 12.4<br>( <i>N</i> =30) | 33 $\pm$ 10<br>( <i>N</i> =22)   |
| Resting potential (mV)                                                                                                                                                                               | Series 1: -58 $\pm$ 13.3 ( <i>N</i> =137)<br>Series 2: -53.4 $\pm$ 18.8 ( <i>N</i> =78) |                                            | 53.8 $\pm$ 15.2<br>( <i>N</i> =34) | 53 $\pm$ 13<br>( <i>N</i> =53)   |
| L-potentials (L-EPSP) at stimulation of distant nematocytes                                                                                                                                          | Large cells                                                                             |                                            |                                    |                                  |
|                                                                                                                                                                                                      | Without distant cyst-discharge*                                                         | With distant cyst-discharge*               |                                    |                                  |
| Amplitude (mV)                                                                                                                                                                                       | 1–24<br>( <i>N</i> =164)                                                                | 10–44<br>25 $\pm$ 6.2 ( <i>N</i> =146)     | n.d.                               | 38 $\pm$ 4<br>( <i>N</i> =12)    |
| Duration of 90% rise (ms)                                                                                                                                                                            | 5.2–24                                                                                  | 2.5–7                                      | n.d.                               | 88 $\pm$ 20<br>( <i>N</i> =12)   |
| Duration at half amplitude of single peak (ms)                                                                                                                                                       | 36–250                                                                                  | 61–300                                     | n.d.                               | 66 $\pm$ 30<br>( <i>N</i> =12)   |
| Duration of decay (ms)                                                                                                                                                                               | 80–550                                                                                  | >500                                       | n.d.                               | 552 $\pm$ 266<br>( <i>N</i> =12) |
| Latency (ms)                                                                                                                                                                                         | 2.6–45<br>( <i>N</i> =164)                                                              | 0.6–10.7<br>2.1 $\pm$ 1.2 ( <i>N</i> =146) | n.d.                               | 93 $\pm$ 6<br>( <i>N</i> =12)    |
| Latency at stimulation of hair cells (ms)                                                                                                                                                            | 9–100                                                                                   |                                            | 13–98                              | n.d.                             |
| T-potentials, depolarizing component (T-EPSP)                                                                                                                                                        |                                                                                         |                                            |                                    |                                  |
| Amplitude (mV) (non-repetitive potentials)                                                                                                                                                           | 20–45                                                                                   |                                            | $\leq$ 55                          | 29 $\pm$ 5<br>( <i>N</i> =9)     |
| Duration of 90% rise (ms)                                                                                                                                                                            | 8–80<br>(incl. smooth start, see Fig. 4C 2)                                             |                                            | n.d.                               | 5 $\pm$ 1.4<br>( <i>N</i> =9)    |
| Duration at half amplitude of single peak (ms)                                                                                                                                                       | 5–32<br>24 $\pm$ 7 ( <i>N</i> =6)                                                       |                                            | 3–5                                | 5.7 $\pm$ 1.4<br>( <i>N</i> =9)  |
| Duration of decay (ms)                                                                                                                                                                               | ~100                                                                                    |                                            | n.d.                               | n.d.                             |
| Latency at mech. stimulation of tentacular shaft (ms)                                                                                                                                                | 30–100                                                                                  |                                            | n.d.                               | n.d.                             |
| T-potentials, hyperpolarizing component (T-IPSP)                                                                                                                                                     |                                                                                         |                                            |                                    |                                  |
| Prevalence                                                                                                                                                                                           | 8% of cells                                                                             |                                            | 100% of cells                      | 100% of cells                    |
| Amplitude (non-repet. pot.) (mV)                                                                                                                                                                     | –3                                                                                      |                                            | –11                                | –8                               |
| Duration at half amplitude (ms)                                                                                                                                                                      | ~100                                                                                    |                                            | 40–50                              | 40–120                           |
| *Most of the stimuli that did not evoke discharge of the stimulated nematocyte were purely mechanical; stimuli that evoked a discharge were mostly chemo-mechanical (see text). n.d.: not determined |                                                                                         |                                            |                                    |                                  |
